# Supplementary material for: Comparison of the local structural stabilities of mammalian prion protein (PrP) by fragment molecular orbital calculations
Source: PubMed Central journal article supplement — Prion. 2013 Mar 1;7(2):185–91. doi: 10.4161/pri.23122 (PMC3609128; doi:10.4161/pri.23122), 2013-03-01
Supplement: prio-7-185-s01.pdf [file prio-7-185-s01.pdf]

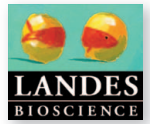

## **Supplemental Material to:**

**Koji Hasegawa, Shirou Mohri and Takashi Yokoyama**

**Comparison of the local structural stabilities of  
mammalian prion protein (PrP) by fragment molecular  
orbital calculations**

**Prion 2013; 7(2)**

**<http://dx.doi.org/10.4161/pri.23122>**

**<http://www.landesbioscience.com/journals/prion/article/23122/>**

| Secondary Structure Elements |                    | Internal Interaction Energies $\Delta E^{\text{Int}}$ / kcal mol <sup>-1</sup> |        |       |         |       |       | Average <sup>a</sup> | $\sigma$ <sup>b</sup> |
|------------------------------|--------------------|--------------------------------------------------------------------------------|--------|-------|---------|-------|-------|----------------------|-----------------------|
|                              |                    | Human                                                                          | Bovine | Mouse | Hamster | Dog   | Cat   |                      |                       |
| Neutral pH models            |                    |                                                                                |        |       |         |       |       |                      |                       |
| 1                            | $\beta 1$          | -30                                                                            | -33    | -42   | -30     | -23   | -39   | -33                  | 7                     |
| 2                            | L1                 | -154                                                                           | -188   | -149  | -84     | -180  | -79   | -139                 | 47                    |
| 3                            | $\alpha 1$         | -568                                                                           | -568   | -555  | -609    | -552  | -635  | -581                 | 34                    |
| 4                            | L2                 | -41                                                                            | -34    | -39   | -52     | -42   | -41   | -42                  | 6                     |
| 5                            | $\beta 2$          | -37                                                                            | -39    | -43   | -36     | -21   | -53   | -38                  | 10                    |
| 6                            | L3                 | -162                                                                           | -180   | -150  | -207    | -102  | -152  | -159                 | 35                    |
| 7                            | $\alpha 2$         | -648                                                                           | -731   | -668  | -666    | -613  | -562  | -648                 | 57                    |
| 8                            | L4                 | -58                                                                            | -62    | -47   | -40     | -51   | -61   | -53                  | 9                     |
| 9                            | $\alpha 3$         | -724                                                                           | -796   | -787  | -851    | -749  | -713  | -770                 | 52                    |
|                              | Total <sup>c</sup> | -2422                                                                          | -2631  | -2480 | -2575   | -2333 | -2335 |                      |                       |
| Mildly acidic pH models      |                    |                                                                                |        |       |         |       |       |                      |                       |
| 1                            | $\beta 1$          | -29                                                                            | -30    | -42   | -32     | -23   | -38   | -32                  | 7                     |
| 2                            | L1                 | -123                                                                           | -162   | -118  | -61     | -143  | -62   | -112                 | 42                    |
| 3                            | $\alpha 1$         | -617                                                                           | -607   | -554  | -605    | -551  | -629  | -594                 | 33                    |
| 4                            | L2                 | -44                                                                            | -38    | -44   | -57     | -43   | -42   | -44                  | 6                     |
| 5                            | $\beta 2$          | -40                                                                            | -39    | -44   | -36     | -22   | -53   | -39                  | 10                    |
| 6                            | L3                 | -166                                                                           | -174   | -150  | -207    | -108  | -150  | -159                 | 33                    |
| 7                            | $\alpha 2$         | -620                                                                           | -746   | -607  | -648    | -566  | -522  | -618                 | 77                    |
| 8                            | L4                 | -61                                                                            | -57    | -45   | -43     | -48   | -65   | -53                  | 9                     |
| 9                            | $\alpha 3$         | -729                                                                           | -798   | -791  | -860    | -764  | -714  | -776                 | 53                    |
|                              | Total <sup>c</sup> | -2429                                                                          | -2651  | -2395 | -2549   | -2268 | -2275 |                      |                       |

Table S1. The internal interaction energies ( $\Delta E^{\text{Int}}$ ) for the secondary structure elements on PrP models under neutral and mildly acidic pH conditions. <sup>a</sup>The average for the values of  $\Delta E^{\text{Int}}$ . <sup>b</sup>The standard deviations  $\sigma$  for the values of the  $\Delta E^{\text{Int}}$ . <sup>c</sup>Sum over the values of  $\Delta E^{\text{Int}}$ .

| Secondary Structure Element Pairs |            |   |            | Pair Interaction Energies, $\Delta E^{\text{Pair}}$ /kcal mol <sup>-1</sup> |        |       |         |      |      |                      |            |
|-----------------------------------|------------|---|------------|-----------------------------------------------------------------------------|--------|-------|---------|------|------|----------------------|------------|
|                                   |            |   |            | Human                                                                       | Cattle | Mouse | Hamster | Dog  | Cat  | Average <sup>a</sup> | $\sigma^b$ |
| 1                                 | $\beta 1$  | - | L1         | -29                                                                         | -32    | -34   | -16     | -23  | -20  | -26                  | 7          |
| 2                                 | $\beta 1$  | - | $\alpha 1$ | +0                                                                          | +0     | +0    | +0      | -0   | +0   | +0                   | 0          |
| 3                                 | $\beta 1$  | - | L2         | -1                                                                          | +0     | -2    | -0      | -0   | -0   | -0                   | 1          |
| 4                                 | $\beta 1$  | - | $\beta 2$  | -27                                                                         | -22    | -24   | -17     | -25  | -36  | -25                  | 6          |
| 5                                 | $\beta 1$  | - | L3         | -28                                                                         | -31    | -17   | -25     | -28  | -13  | -24                  | 7          |
| 6                                 | $\beta 1$  | - | $\alpha 2$ | -3                                                                          | -3     | -22   | -1      | -10  | -5   | -7                   | 8          |
| 7                                 | $\beta 1$  | - | L4         | +0                                                                          | -0     | +0    | +0      | +0   | +0   | +0                   | 0          |
| 8                                 | $\beta 1$  | - | $\alpha 3$ | -1                                                                          | +2     | -7    | +2      | -4   | -3   | -2                   | 4          |
| 9                                 | L1         | - | $\alpha 1$ | -141                                                                        | -85    | -196  | -182    | -129 | -104 | -139                 | 43*        |
| 10                                | L1         | - | L2         | -56                                                                         | -76    | -34   | -24     | -100 | -36  | -54                  | 29*        |
| 11                                | L1         | - | $\beta 2$  | -10                                                                         | -14    | -14   | -10     | -14  | -9   | -12                  | 2          |
| 12                                | L1         | - | L3         | -18                                                                         | +3     | +6    | +5      | +5   | +4   | +1                   | 9          |
| 13                                | L1         | - | $\alpha 2$ | +111                                                                        | +88    | +95   | +110    | +98  | +110 | +102                 | 10         |
| 14                                | L1         | - | L4         | -32                                                                         | -39    | -30   | -37     | -28  | -31  | -33                  | 4          |
| 15                                | L1         | - | $\alpha 3$ | -130                                                                        | -92    | -67   | -65     | -134 | -93  | -97                  | 30*        |
| 16                                | $\alpha 1$ | - | L2         | -20                                                                         | -33    | -26   | -23     | -5   | -28  | -22                  | 9          |
| 17                                | $\alpha 1$ | - | $\beta 2$  | +0                                                                          | -0     | +0    | +0      | +0   | +0   | +0                   | 0          |
| 18                                | $\alpha 1$ | - | L3         | +1                                                                          | +1     | -3    | -2      | -2   | -1   | -1                   | 1          |
| 19                                | $\alpha 1$ | - | $\alpha 2$ | +10                                                                         | +6     | -50   | -59     | -46  | -30  | -28                  | 30*        |
| 20                                | $\alpha 1$ | - | L4         | -48                                                                         | -93    | -4    | -3      | +9   | +5   | -22                  | 40*        |
| 21                                | $\alpha 1$ | - | $\alpha 3$ | -48                                                                         | -40    | -80   | -22     | +10  | -48  | -38                  | 30*        |
| 22                                | L2         | - | $\beta 2$  | -19                                                                         | -26    | -22   | -23     | -17  | -13  | -20                  | 4          |
| 23                                | L2         | - | L3         | -0                                                                          | +1     | +1    | +1      | -3   | +1   | -0                   | 2          |
| 24                                | L2         | - | $\alpha 2$ | -20                                                                         | -15    | -13   | -33     | -58  | -13  | -25                  | 18         |
| 25                                | L2         | - | L4         | -1                                                                          | -1     | +0    | -1      | +19  | +1   | +3                   | 8          |
| 26                                | L2         | - | $\alpha 3$ | -13                                                                         | -14    | -9    | -8      | +35  | -8   | -3                   | 19         |
| 27                                | $\beta 2$  | - | L3         | -15                                                                         | -6     | -13   | -22     | -13  | -13  | -14                  | 5          |
| 28                                | $\beta 2$  | - | $\alpha 2$ | -35                                                                         | -16    | -18   | -27     | -24  | -1   | -20                  | 11         |
| 29                                | $\beta 2$  | - | L4         | +1                                                                          | +1     | +1    | +1      | +1   | +1   | +1                   | 0          |
| 30                                | $\beta 2$  | - | $\alpha 3$ | -21                                                                         | -23    | -40   | -27     | -18  | -12  | -23                  | 10         |
| 31                                | L3         | - | $\alpha 2$ | -68                                                                         | -24    | -23   | -44     | -26  | -54  | -40                  | 19         |
| 32                                | L3         | - | L4         | +7                                                                          | -2     | -3    | -3      | -3   | -2   | -1                   | 4          |
| 33                                | L3         | - | $\alpha 3$ | +41                                                                         | -13    | -20   | -39     | -12  | -10  | -9                   | 27*        |
| 34                                | $\alpha 2$ | - | L4         | -115                                                                        | -95    | -111  | -171    | -128 | -115 | -122                 | 26*        |
| 35                                | $\alpha 2$ | - | $\alpha 3$ | -237                                                                        | -143   | -167  | -225    | -216 | -274 | -211                 | 48*        |
| 36                                | L4         | - | $\alpha 3$ | -3                                                                          | -6     | -9    | +2      | +10  | +28  | +4                   | 14         |
| Total                             |            |   |            | -966                                                                        | -843   | -954  | -988    | -880 | -822 |                      |            |

Table S2. The pair interaction energies ( $\Delta E^{\text{Pair}}$ ) of 6 PrPs under mildly acidic pH condition.

The pair interaction energies were evaluated by summing over the calculated IFIEs between the residues on the elements pairs. <sup>a</sup> The average of  $\Delta E^{\text{Pair}}$ . <sup>b</sup> The standard deviations of  $\Delta E^{\text{Pair}}$ . <sup>c</sup> \*:  $\sigma \geq 20$  kcal/mol. The blue-marked  $\Delta E^{\text{Pair}}$  boxes are the maximum value (most repulsive interaction) among the species. The red-marked  $\Delta E^{\text{Pair}}$  boxes are the minimum value (most attractive interaction) among the species.

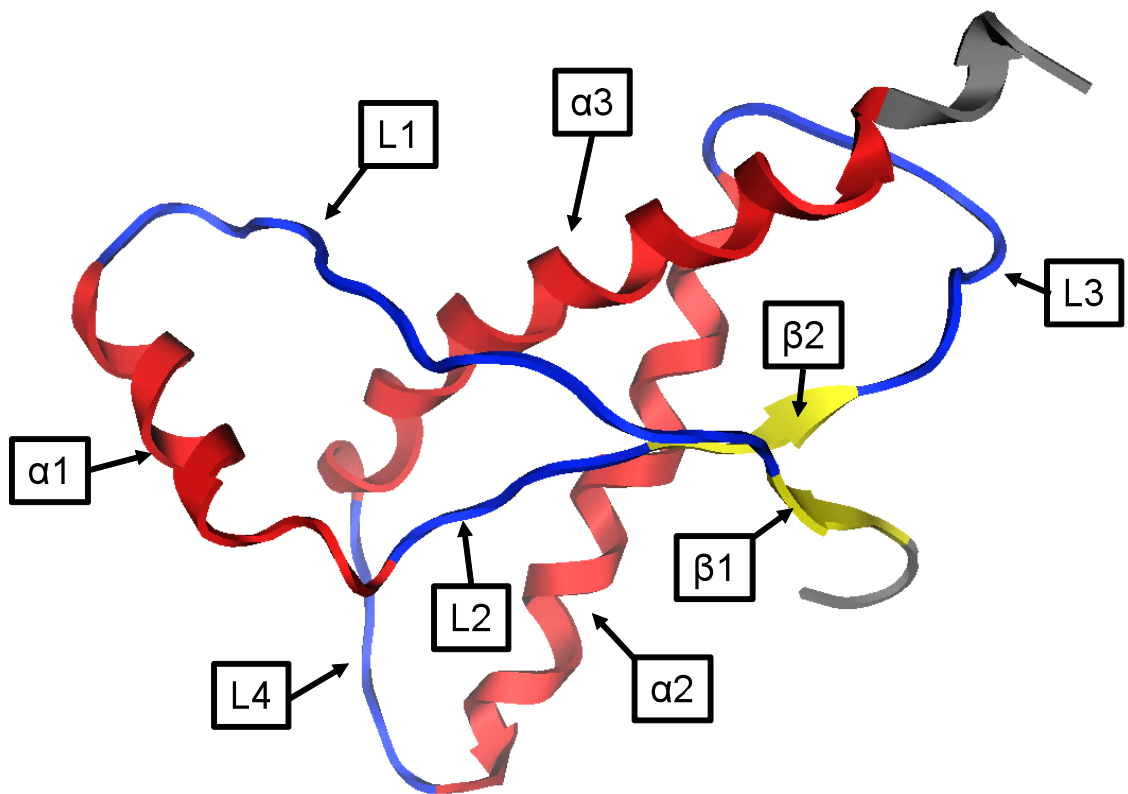

Fig. S1. The secondary structure elements of PrP: three  $\alpha$ -helices ( $\alpha 1$ ,  $\alpha 2$  and  $\alpha 3$ ); two  $\beta$ -strand ( $\beta 1$  and  $\beta 2$ ); four loops (L1, L2, L3 and L4).

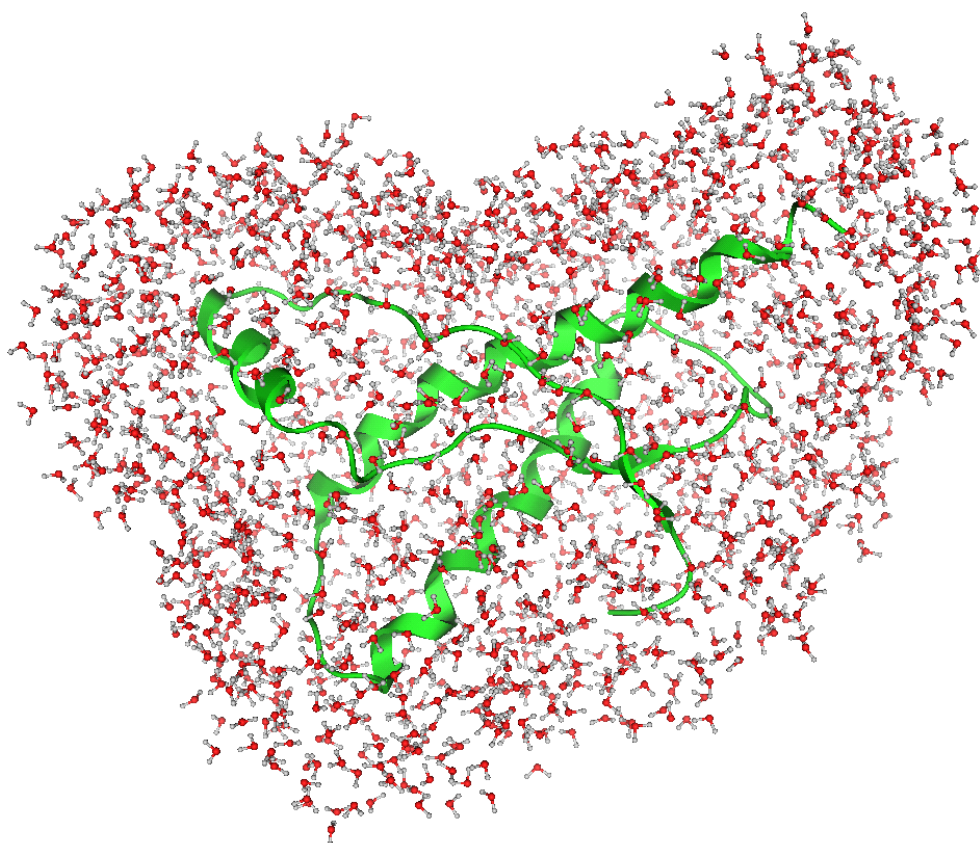

Fig. S2. Example of PrP structural models in water that used in FMO calculations. Human PrP protein of the first conformer deposited in PDB (code 1QM3) rendered as green-colored ribbon type was immersed by 1643 water molecules depicted as ball-and-stick type.
